# Supplementary material
Source: publisher figshare collection journal article supplement (https://sage.figshare.com/ndownloader/files/31294596)
Supplement: Supplementary file 1 [file 31294596]

## Sheet: SC1_P
Min_depth	Max_depth	Alnus_crispa_seeds	Andromeda_polifolia_leaves	Betula_gl_bracts	Betula_gl_leaves	Betula_gl_seeds	Brown_Mosses	Caliergon_spp.	Carex_seeds	Carex_two_sided_seeds	Cenococum	Chamaedaphne_calyculata_leaves	Chamaedaphne_calyculata_seeds	Char_estimated_pourcentage	Char_large_pieces	Cicuta_bulbifera_seeds	Cyperaceae_seeds	Dicranum_spp	Drepanocladus_fluitans	Drepanocladus_ssp	Ericaceous_roots	Ericaceous_twig	Ericaceous_leaves	Ericaceous_stems	Eriophorum_spp_seeds	Larix_lar_needles	Lichen	Ligneous	Ligneous_roots	Lysimachia_thyrsiflora	Menyanthes_trifoliata_seeds	Myrica_gale_leaves	Myrica_gale_seeds	Paludella_squarosa	Picea_mariana_needles	Picea_marina_seeds	Polytrichum_spp	Rhododendron_spp_leaves	Rubus_cham_seeds	Rumex_obtusifolius_seeds	Salix_spp_leaves	Salix_spp_seeds	Scirpus_ssp_seeds	Scorpidium_spp.	Sedges_above_ground	Sedges_roots	Sphagnum	Sphagnum_fuscum	Tomenthypnum_spp
cm	cm	count per cc	count per cc	count per cc	count per cc	count per cc	%	count per cc	count per cc	count per cc	count per cc	count per cc	count per cc	%	count per cc	count per cc	count per cc	%	%	%	%	%	count per cc	%	count per cc	count per cc	%	%	%	count per cc	count per cc	count per cc	count per cc	count per cc	count per cc	count per cc	count per cc	count per cc	count per cc	count per cc	count per cc	count per cc	count per cc	count per cc	%	%	%	%	%
0	1	0	0	0	0	0	0	0	0	0	0	0	0	0	0	0	0.333333	0	0	0	20	0	0	0	0	0	0	50	25	0	0	0	0	0	0.333333	0	1	2.66667	0	0	0	0	0	0	0	0	0	0	0
4	5	0	0	0	0	0	0	0	0	0	0	0	0	0	0	0	0	0	0	0	47	0	0	50	0	0	2	50	0	0	0	0	0	0	0	0	0	0	0	0	0	0	0	0	0	0	0	0	0
9	10	0	0	0	0	0	0	0	0	0	0	0	0	0	0.666667	0	0	0	0	0	30	0	0	0	0	0	20	80	50	0	0	0	0	0	0	0	0	0	0	0	0	0	0	0	0	0	0	0	0
14	15	0	0	0	0	0	1	0	0	0	0	0	0	1	0	0	0	0	0	0	75	0	0	0	0	0	25	0	0	0	0	0	0	0	0	0	0	0.666667	0	0	0	0	0	1	0	0	0	0	0
19	20	0	0	0	0	0	0	0	0	0	0	0	0	10	0	0	0	0	0	0	25	0	0	0	0	0	0	0	10	0	0	0	0	0	0	0	0	0	0	0	0	0	0	0	5	50	0	0	0
24	25	0	0	0	0	0	0	0	0	0	0	0	0	100	0	0	0	0	0	0	10	70	0	0	0	0	1	90	0	0	0	0	0	0	3	0	0	0.666667	0	0	0	0	0	0	0	0	0	0	0
29	30	0	0	0	0	0	0	0	0	0	0	0	0	1	0	1	0	0	0	0	0	0	0	0	0	0	0	15	0	0	0	0	0	0	0	0	0	0.333333	0	0	0	0	0	0	0	80	0	0	0
34	35	0	0	0.5	0	1	0	0	0	0	0	0	0	0	0	0	0	0	0	0	0	0	0	0	0	0	0	20	0	0	0.375	0	0	0	0	0	0	0	0	0	0	0	0	0	70	10	0	0	0
39	40	0	0	0.666667	0	1.66667	15	0	0	0	0	0	0	0	0	0	0	0	0	0	0	0	0	0	0	25	0	20	0	0	0	0	0	0	3.66667	0	0	0.333333	0	0	0	0	0	0	40	15	0	0	0
44	45	0	0	3.66667	12	12.3333	5	0	0	0	0	0	0	0	0	8	0	0	0	0	0	0	0	0	0	13	0	0	0	0	0	0	0	0	0	0	0	0	1	0	0	0	0	0	20	70	0	0	0
49	50	0	0	0	0	0	45	0	0	0	0	0	0	0	1.33333	0	0	0	0	0	20	10	0	0	0	4	5	0	0	0	0	0	0	0	5.33333	0	10	1.66667	0	0	0	0	0	0	0	40	1	0	0
54	55	0	0	0	0	0	0	0	0	0	0	0	0	0	0	0	0	0	0	0	0	0	0	0	0	0	5	30	0	0	0	0	0	0	2.33333	1	1	2	0	0	0	0	0	0	0	10	44	44	0
59	60	0	0	0	0	0	1	0	0	0	0	0	0	0	0	0	0	0	0	0	0	0	0	0	0	0	5	5	0	0	0	0	0	0	0	0	1	0	0	0	0	0	0	0	0	0	95	0	0
74	75	0	0	0	0	0	0	0	0	0	0	0	0	50	0	0	0	0	95	0	0	0	0	0	0	165	0	100	75	0	1.33333	0	0	0	0	0	0	0.333333	0	0	0	0	0	1	0	0	0	0	0
79	80	0	0	0	0	2	0	0	0	0	0	0.333333	0.333333	0	0	0	0	0	0	0	0	0	0	0	0	0	0	1	10	0	0	0	0	0	0.666667	0	0	0	0	0	0	0	0	0	20	20	40	0	0
84	85	0	0	0	0	0.333333	40	0	0	4	0	0	0	0	0	0	0	0	0	0	0	0	0	0	0	138	0	0	0	0	1	0	0	0	0	0	0	0	0	0	0	4	1	0	10	50	0	0	0
89	90	0	0	0	0	0	45	0	0.333333	0	0	0	0	0	0	0	0.333333	45	0	0	0	0	0	0	0	30	0	0	0	0	1	0	0	0	0	0	0	0	0	0	0	0	0	0	10	0	0	0	0
99	100	0	0	0	0	0	0	0	0	0	0	0	0	0	0	0	0	0	0	0	0	0	0	0	0	158	0	0	0	0	0	0	0	0	0	0	0	0	0	0	0	0	0	0	1	1	0	0	0
104	105	0	0	0	0	0	0	0	0	1	0	0	0	0	0	0	0	0	0	0	0	0	0	0	0	37	0	0	0	0	0	0	0	0	0	0	0	0	0	0	0	0	0	1	20	30	1	0	0
109	110	0	0	0	0	0.333333	20	0	0	0	0	0	0	0	0	0	0	0	0	0	0	0	1	40	0	28	0	40	0	0	0	0	0	0	0	0	5	9.66667	0	0	0	0	0	0	0	40	1	0	0
114	115	0	0	0	0	0.333333	1	0	0.333333	0	0	0	0	25	0	0	0	0	1	0	40	0	0	15	0	1	10	25	0	0	0	0	0	0	1	1	0	0	0	0	0	0	0	0	0	20	0	0	0
119	120	0	0	0	0	0	0	0	0	0	0	0	0	0	0	0	0	0	0	0	10	0	0	0	0	0	0	10	0	0	0	0	0	0	0	0	0	1	0	0	0	0	0	0	10	15	30	0	0
124	125	0	0	0	0	0	0	0	0	0	0	0	0	30	0	0	0	0	0	0	10	0	0	30	0	3	0	0	40	0	0	0	0	0	3.33333	0	0	1	0	0	0	0	0	0	0	10	1	0	0
129	130	0	0	0	0	0	0	0	0	0	0	0	0	0	0	0	0	0	0	0	0	0	0	50	0	0	0	75	0	0	0	0	0	0	9.33333	0	0	4	0	0	0	0	0	0	0	0	10	0	0
134	135	0	0	0	0	0	20	0	0	0	0	0	0	0	0	0	0	0	0	0	75	0	0	0	0	0	0	0	80	0	0	0	0	0	0	0	0	1	0	0	0	0	0	0	0	1	0	0	0
139	140	0	0	0	0	0	0	0	0	0	0.333333	0	0	50	0	0	0	0	0	0	10	0	0	0	0	2	1	20	60	0	0	0	0	0	0	0	0	0	0	0	0	0	0	0	0	5	0	0	0
144	145	0	0	0	0	0	0	0	0	0	0	0	0	1	0	0	0	0	0	0	0	0	0	0	0	0	5	80	20	0	0	0	0	0	0.333333	0	0	0	0	0	0	0	0	0	0	0	0	0	0
149	150	0	0	0	0	0.333333	0	0	0	0	0	0	0	0	0	0	0	0	0	0	5	0	0	0	0	0	20	90	10	0	0	0	0	0	0	0	0	0	0	0	0	0	0	0	0	0	0	0	0
154	155	0	0	0	4	0	0	0	0	0	0	0	0	5	0	0	0	0	0	0	0	0	0	20	0	0	0	30	50	0	0	1.66667	0	0	0.666667	0	0	0	0	0	0	0	0	0	10	0	0	0	0
159	160	0	0	0	0	0	0	0	0	0	0	0	0	35	7.33333	0	0	0	0	0	0	0	0	0	0	0	0	20	0	0	0	0	0	0	0	0	0	0	0	0	0	0	0	0	30	50	1	0	0
164	165	0	0	0	0	0	0	0	0	0	0	0	0	0	0	0	0	0	0	0	0	0	0	0	0	0	1	70	30	0	0	0	0	0	0	0	0	0	0	0	0	0	0	0	0	20	0	0	0
169	170	0	0.666667	0	0	0	0	0	0	0	0	0	0	0	3	0	0	0	0	0	0	0	0	0	0	0	20	10	10	0	0.333333	0	0	0	0.666667	0	0	0	0	0	0	0	0	0	0	20	1	0	0
174	175	0	0	0	0	0	0	0	0	0	0	0	0	5	0	0	0	0	0	0	0	0	0	0	0	0	0	60	0	0	0	0.333333	0	0	0.333333	0	0	0	0	0	0	0	0	1	30	20	0	0	0
179	180	0	0	0	0	0.5	1	0	0	0	0.125	0	0	75	7.125	0	0	0	0	0	1	0	0	0	0	5	0	25	0	1	0	0.5	0	0	0	0	0	0	0	0	0	0	0	0	20	25	1	0	0
184	185	0	0	0	2	0.666667	0	0	0	0	0	0	0	0	0	0	0	0	0	0	0	0	0	0	0	25	0	20	0	0	0	0.333333	0	0	0	0	0	0	0	0	0	0	0	0	0	20	0	0	0
189	190	0	0	0	0	0.333333	0	0	0	0	0.666667	0	0	10	0	0	0	0	0	0	40	0	0	0	0	0	20	0	40	0	0	0	0	0	0	0	0	0	0	0	0	0	0	0	0	40	1	0	0
194	195	0	0	0	0	0	0	0	0	0	0	0	0	20	0	0	0	0	0	0	0	0	0	0	0	228	0	75	0	0	0.333333	0	0	0	0	0	0	0	0	0	0	0	0	0	0	0	0	0	0
199	200	0	0	0	0	0	20	0	0.333333	0	0	5.83333	0	0	0	0	0.666667	0	0	0	0	0	0	1	0	22	0	20	0	0	0.166667	0	0	0	3.66667	0	0	0	0	0	0	0	0	0	0	25	0	0	0
204	205	0	0	0	10	0	0	3	0	0	0	0	0	0	0	0	0	0	0	0	0	0	0	0	0	29	0	15	10	0	0.666667	27.6667	0	0	0.333333	0	5	0	0	0	3	1	1	1	0	15	0	0	0
209	210	0	0	0	0	0	0	0	0	0	0	0	0	0	0	0	0	0	0	0	0	0	0	5	0	0	0	0	0	0	0	0	0	0	13.3333	0	0	1.33333	0	0	0	0	0	0	0	0	80	0	0
214	215	0	0	0	4	0	20	1	0	0	0	0	0	0	0	0	0	0	1	8	0	0	0	0	0	24	0	5	10	0	0.333333	12.6667	0	10	1.33333	0	0	0	0	0	3	0	0	0	0	10	10	10	2
219	220	0	0	0	0	1.33333	1	0	0	0	0	1	0	0	0	0	0	0	0	0	0	0	0	10	0	5	0	0	0	0	0	0	0	0	0.666667	0	0	0	0	0	0	0	0	0	40	40	1	0	0
224	225	0	0	0	0	0	0	0	0	0	0	0	0	0	0	0	0	0	0	0	0	0	0	0	0	0	0	10	5	0	0.2	0	0	0	0	0	0	0	0	0	0	0	0	0	40	45	0	0	0
234	235	0	0	0	2	0	0	5	0	0	0	0	0	0	0	0	0	0	0	2	0	0	0	0	0	0	0	15	10	0	0	10.6667	0	0	0	0	0	0	0	1	0	0	3	3	30	15	0	0	0
239	240	0	0	0	0	1	5	5	0	0	0	5	0	0	0	0	0	0	0	0	0	0	0	2	0	0	0	25	5	0	0	0	0	0	0	0	0	0	0	0	0	0	0	0	0	50	0	0	0
244	245	0	0	0	0	0	0	0	0	0	0	0	0	0	0	0	0	0	0	0	0	0	0	0	0	0	0	10	0	0	0	0.333333	0	0	0	0	0	0	0	0	0	0	0	1	20	40	0	0	0
254	255	0	0	0	13	0.333333	0	0	0	0	0	0	0	0	0	0	0	0	1	0	0	0	0	0	0	0	0	50	0	0	0.333333	2.33333	0	0	0	0	0	0	0	0	0	0	0	1	10	40	5	0	1
259	260	0	0	0	0	1	1	1	0	0	0	0.333333	0	0	0	0	0	0	0	0	0	0	0	0	0	0	0	50	3	0	0	0	0	0	0	0	0	0	0	0	0	0	0	0	0	40	5	0	0
264	265	0	0	0	0	0.333333	0	0	0	0	0	0	0	0	0	0	0	0	10	0	0	0	0	0	0	1	0	40	20	0	0	2.33333	0.333333	0	0	0	0	0	0	1	0	3	0	1	0	20	0	0	0
269	270	0	0	0	0	0.2	10	0	0.2	0	0.6	0	0	0	0	0	0.2	0	0	0	0	0	0	60	0	0	0	60	0	0	0	0	0.2	0	0	0	0	0	0	0	0	0	0	0	1	30	1	0	0
274	275	0	0	0	5	0	0	0	0	0	0.666667	0	0	0	0	0	0	0	0	0	0	0	0	0	0	0	0	30	0	0	0	1	0	5	0	0	0	0	0	1	0	5	0	0	0	15	0	0	0
279	280	1	0	0	0	1	1	0	0.666667	0	0	0	0	0	0	0	0.666667	0	0	0	0	0	0	0	0	0	0	80	0	0	0	0	0	0	0	0	0	0	0	0	0	0	0	0	0	15	1	0	0
284	285	0	0	0	4	2.66667	0	0	0	0	0	0	0	0	0	0	0	0	0	1	0	0	0	0	0	0	0	75	0	0	0	0	0	0	0	0	0	0	0	0	0	1	0	1	0	5	1	0	0
289	290	0	0	0	2	1.66667	0	0	0	2	0	0	0	0	0	0	0	0	0	0	0	0	0	0	0	0	0	70	0	0	0.333333	0	0	0	0	0	0	0	0	0	0	0	0	1	10	25	0	0	0
300	301	0	0	0	0	0	0	0	0	0	0.333333	0.333333	0	0	0	0	0	0	0	0	0	0	0	0	0	1	0	25	0	0	0.333333	0	0	0	0.333333	0	0	0	0	0	0	0	0	0	0	60	1	0	0
304	305	0	0	0	0	0	10	0	0.333333	0	0	0	0	0	0	0	1.33333	0	0	0	0	0	0	0	3	0	0	20	20	0	0	0	0	0	0.666667	0	10	0	0	0	0	0	0	0	0	50	0	0	0
314	315	2	0	0	0	0	5	0	2.66667	0	0	0	0	0	0	0	2.66667	0	0	0	0	0	0	0	0	0	0	15	0	0	0	0	0	0	0.333333	0	0	0	0	0	0	0	0	0	10	37	0	0	0
325	326	1	0	0	0	0.666667	13	0	0	0	0	0	0	0	0	0	0	0	0	0	15	0	10	5	0	0	0	30	0	0	0	0	0	0	2	0	0	0	0	0	0	0	0	0	10	50	10	0	0
[truncated: 3 more columns]

## Sheet: SC1-BE
Min_depth	Max_depth	Sedges_above_ground	Sedges_roots	Bryophytes	Bryophytes_sphagnum	Brown_moss	Ligneous_wood	Ligneous_roots	Ligneous_leaves	Lichen	Charcoal
cm	cm	%	%	%	%	%	%	%	%	%	%
0	1	10	0	90	90	0	0	0	0	0	0
7	8	10	0	90	90	0	0	0	0	0	0
16	17	10	30	60	60	0	0	0	0	0	0
24	25	10	40	50	50	0	0	0	0	0	0
27	28	20	30	50	50	0	0	0	0	0	0
49	50	10	20	70	70	0	0	0	0	0	0
67	68	0	10	10	10	0	50	10	0	10	30
76	77	0	5	0	0	0	80	10	0	5	10
84	85	50	30	0	0	0	20	0	0	0	0
91	92	60	20	0	0	0	20	0	0	0	0
92	93	20	20	10	10	0	50	0	0	0	0
109	110	20	20	10	10	0	50	0	0	0	10
116	117	80	20	0	0	0	0	0	0	0	0
124	125	30	10	0	0	0	50	0	10	0	0
146	147	50	10	20	0	20	20	0	0	0	0
153	154	20	0	0	0	0	30	50	0	0	30
157	158	20	0	0	0	0	30	50	0	0	30
180	181	20	50	10	0	10	20	0	0	0	0
202	203	50	30	0	0	0	20	0	5	0	0
214	215	10	10	0	0	0	0	80	0	0	40
224	225	0	0	55	50	5	0	40	5	0	0
232	233	0	0	70	60	10	10	20	0	0	0
237	238	20	20	0	0	0	30	0	0	0	0
245	246	0	20	0	0	0	60	0	10	0	0
261	262	30	20	0	0	0	50	0	0	0	0
271	272	0	20	5	5	0	50	0	0	0	0
281	282	0	20	0	0	0	50	0	0	0	0
286	287	0	20	0	0	0	50	0	0	0	0

## Sheet: SC1-BC
Min_depth	Max_depth	Alnus_spp_seed	Alnus_ssp_bract	Andromeda polifolia_seeds	Andromeda_polifolia_leaves	Betula_glandulosa_bract	Betula_glandulosa_leaves	Betula_glandulosa_seed	Brown_moss	Carex_two_sides_seeds	Carex_three_sides_seeds	Cenococum	Chamaedaphne_calyculata_leaves	Drepanocladus/Hamatocaulis_spp	Ericaceous_leaves	Ericaceous_roots	Ericaceous_wood	Larix_laricina_needles	Ligneous_wood	Lysimachia_spp_seed	Menyanthes_trifolata_seed	Mineral	Myrica_gale_leaves	Picea_mariana_needles	Ploytrichum_spp_leaves	Polytrichum_spp_stem	Scheuzeria_palustris_seeds	Scirpus_spp_seed	Sedges_above_ground	Sphagnum	Typha_latifolia_seeds	Vaccinium_oxycocos_leaves	Vaccinium_oxycocos_seeds	Vaccinium_oxycocos_twig	Vaccinium_vitis_iadea_leaves	Viola_ssp_seeds
cm	cm	count per cc	count per cc	count per cc	count per cc	count per cc	count per cc	count per cc	%	count per cc	count per cc	count per cc	count per cc	%	count per cc	%	%	count per cc	%	count per cc	count per cc	%	count per cc	count per cc	count per cc	count per cc	count per cc	count per cc	%	%	count per cc	count per cc	count per cc	count per cc	count per cc	count per cc
1	2	0	0	0	0	0	0	0	0	0	0	0	0	0	0.98401	10	0	0	0	0	0	0	0	0	0	0	0	0	0	90	0	0.98401	0	0	0	0
3	4	0	0	0	0.740741	0	0	0	0	0	0	0	0.740741	0	0	15	0	0	0	0	0	0	0	0.37037	0	0	0	0	0	85	0	2.22222	0	0	0	0
7	8	0	0	0	0	0	0	0	0	0	0	0	0	0	0.14652	20	0	0	0	0	0	0	0	0	0	0	0.14652	0	0	80	0	0.14652	0	0	0	0
9	10	0	0	0	0	0	0	0	0	0	0	0	0	0	0	0	0	0	0	0	0	0	0	0	0	0	0	0	0	90	0	0	0	0	0	0
13	14	0	0	0	0	0	0	0	0	0	0	0	1.36364	0	0	10	0	0	0	0	0	0	0	0	0	0	0	0	0	90	0	0	0	0	0	0
17	18	0	0	0	0	0	0	0	0	0	0	0	0	0	0.375	0	0	0	0	0	0	0	0	0	0	0	0	0	0	95	0	0.375	0	0.125	0	0
25	26	0	0	0	0.243902	0	0	0	0	0	0	0	0.97561	0	1.97561	5	0	0	0	0	0	0	0	0	0	0	0	0	0	95	0	0	0	0.243902	0	0
30	31	0	0	0	0	0	0	0	0	0	0	0	0.4	0	0.4	1	0	0	0	0	0	0	0	0	0	0	0	0	0	95	0	0	0	0	0	0
38	39	0	0	0	0	0	0	0	0	0	0	0	0	0	0	0	0	0	0	0	0	0	0	0.333333	0	0	0	0	1	85	0	0	0	0	0	0
43	44	0	0	0	0	0	0	0	0	0	0	0	0	0	0	3	0	0	0	0	0	0	0	0	0	0	0	0	0	97	0	0	0	0	0	0
47	48	0	0	0	0	0	0	0	0	0	0	0	0	0	0	5	0	0	0	0	0	0	0	0	0	0	0	0	0	95	0	0	0	0	0	0
54	55	0	0	0	0	0	0	0	0	0	0	0	0	0	0	1	0	0	0	0	0	0	0	0	0	0	0	0	0	99	0	0	0	0	0	0
59	60	0	0	0	0	0	0	2.66667	0	0	0	0	0	0	1	1	0	0	0	0	0	0	0	0	0	0	0.666667	0	5	95	0	1	0	0	0	0
64	65	0	0	0	0	0	0	0	0	0	0	0	0	0	0	0	0	0.25	0	0	0	0	0	0	0	0	0	0	0	100	0	0	0	0	0	0
69	70	0	0	0	0	0	0	1.25	0	0	0	0	0.75	0	0.75	0	0	4.25	5	0	0	0	0	0	0	0	0	0	0	85	0	0	0	0	0	0
79	80	0	0	0	0	0	0	0	80	0	0	0	0	0	0.666667	0	0	24	0	0	0	0	0	0	0	0	0	0	1	5	0	0.333333	0	0.333333	0.333333	0
88	89	0	0	0	0	0	0	0	0	0	0	0	0	0	0	10	20	3	20	0	0	0	0	0	0	0	0	0	5	50	0	6	0	0	0	0
90	91	0	0	0	0	0	0	0	50	0	0	0	0	0	3	0	0	1.5	0	0	0	0	0	0	0	0	0	0	10	10	0	3	0	1.5	0	0
95	96	0	0	0	0.111111	0	0	0.222222	15	0	0	0	0.222222	0	0	0	0	0	0	0	0	0	0	0	0.333333	0	0	0	5	50	0	0.555556	0	0.333333	0	0
100	101	0	0	0	0	0	0	2	10	0	0	0	0	0	0	0	0	2.66667	0	0	0	0	0	0	0	0	0	0	30	15	0	0	0	0	0	0
109	110	0	0	0	0	0	0	0	0	0	0	0	0	0	0	5	0	0	0	0	0	0	0	0	0	0	0	0	25	75	0	0	0	0	0	0
119	120	0	0	0	0	0	0	0	0	0	0	0	0.666667	0	3	0	0	0	1	0	0	0	0	4.66667	0	0	0	0	4	85	0	0	0	0	0.333333	0
126	127	0	0	0	0	0	0	0	9	0	0	0	0	0	0.5	10	30	0	0	0	0	0	0	5.75	0.5	1.75	0	0	0	40	0	0.5	0	0	0	0
128	129	0	0	0	0	0	0	0	5	0	0	0	1	0	1	0	0	0	63	0	0	0	0	4	1	0.8	0	0	0	5	0	0	0	0	0	0
130	131	0	0	0	0	0	0	0	0	0	0	0	0	0	0	5	70	0	90	0	0	0	0	1.85714	0	0	0	0	0	4	0	0	0	0	0	0
132	133	0	0	0	0	0	0	0	0	0	0	0	0	0	0	5	75	0	75	0	0	0	0	1.75	0	0	0	0	0	5	0	0	0	0	0	0
134	135	0	0	0	0	0	0	0	0	0	0	0.2	0	0	0	0	0	0	0	0	0	0	0	0.2	0	0	0	0	0	5	0	0	0	0	0	0
136	137	0	0	0	0	0	0	0.25	0	0	0	0	0	0	0	30	0	0	0	0	0.25	0	0	0.25	0	0	0	0	0	5	0	0	0	0	0	0
138	139	0	0	0	0	0	0	0.333333	1	0	0	0	0	0	0	0	0	1.33333	0	0	0	0	0	0.333333	0	0	0	0	22	5	0	0	0	0	0	0
144	145	0	0	0	0	0	0	0	0	0	0	0	0	0	0	0	0	0	15	0	0	0	0	1.6	0.4	0.4	0	0	15	5	0	0	0	0	0	0
149	150	0	0	0	0	0	0	0	0	0	0	0	0	0	0	0	0	0	0	0	0	0	0	0	0	0	0	0	0	1	0	0	0	0	0	0
159	160	0	0	0	0	0	0	1.66667	0	0	0	0	7.33333	0	7.33333	0	0	0	25	0	0	0	0	0.666667	0	0	0	0	10	0	0	0	0	0	0	0.666667
164	165	0	0	0	0	0	0	0	0	0	0	0	0	0	0	0	0	0	10	0	0.8	0	0.4	0	0	0	0	0	30	0	0	0	0	0	0	0
169	170	0	0	0	0	0	0	0.5	0	0	0	0	0	0	1.5	0	0	0	0	0	0.333333	0	0	0.333333	0	0	0	0	0	0	0	1.5	0	4.16667	0	0
179	180	0	0	0	0	0	0	0.333333	0	0	0	0	0	0	0	0	0	0	0	0	0	0	0	0	0	0	0	0	15	1	0	0	0	0	0	0
184	185	0	0	0	0	0	0	0	0	0	0.25	0	0	0	0	0	0	0	15	0	0.5	0	0	0	0	0	0	0	40	0	0	0	0	0	0	0
189	190	0	0	0	0	0	0	0	0	0	0	0	0	0	0	0	0	0.2	50	0	0.2	0	0	0	0	0	0	0	20	0	0	0	0.2	0	0	0
199	200	0	0	0	0	0	0	0	15	0	0.333333	0	4	10	4	0	50	0	50	0	0	0	0	0	0	0	0	0	0	0	0	0	0	0	0	0
204	205	0	0	0	0	0	0	0	0	0	0	0	0	0	0	0	0	0	80	0	0	0	4	0	0	0	0	0	0	0	0	0	0	0	0	0
209	210	0	0	0	0	0	0	0	0	0	0.4	0	0	0	0	0	0	0	40	0	0	0	2.4	0	0	0	0	0	0	0	0	0	0	0	0	0
219	220	0	0	0	0	0	0	0	54	0	0	0	0	50	0	0	20	0	20	0	0	0	7.16667	1	0.333333	0	0	0	0	0	0	0	0	0	0	0
229	230	0	0	0	0	0	1.2	0	30	0	0	0	0.6	0	0	0	0	0	50	0	0	0	5.8	0	0	0	0	0	0	0	0	0	0	0	0	0
239	240	0	0	0	0	0	0	1.33333	20	0	0	0	0	14	0	0	0	0	10	0	0	0	2.33333	0	0	0	0	0	10	0	0	0	0	0	0	0
249	250	0	0	0	0	0	0	0.75	5	0	0	0	0	0	2	0	0	0	75	0	0	0	0	0	0	0	0	0	20	0	0	1.25	0	0	0.75	0
259	260	0.333333	0.333333	0	0	0.333333	0	0	0	0	0	0	0	5	0	0	0	0	30	0	0	0	0	1	0	0	0	0	10	0	0	0	0	0	0	0
269	270	0	0	0	0	0.6	0.8	0.2	0	0	0.6	0.2	0	0	0.4	0	0	0	50	0	0.4	0	0	1.8	0	0	0	0.2	5	0	0	0.4	0	0	0	0.4
273	274	0	0	0	0	0	0.333333	0.5	0	0	0	0.166667	0	0	0	0	0	0	50	0	0.166667	0	0	2.33333	0	0	0	0.166667	10	0	0	0.666667	0	0	0	0.166667
279	280	0.5	0.25	0	0	0.25	0	0.25	0	0	0	0	0	0	0	0	0	0	40	0	0	0	0.25	0.75	0	0	0	0	0	0	0	0	0	0	0	0
284	285	0.2	0	0	0	0.2	0	1	0	0	0.4	0	0	1	0	0	0	0	60	0	0	0	0	0.6	0	0	0	0	0	1	0	0	0	0	0	0.2
289	290	0.2	0	0	0	0.6	0.8	0.6	0	0	1.2	0	0	0	0	0	0	0	40	0.4	0	0	0	1.8	0	0	0	0	5	0	0	0	0	0	0	0.4
299	300	0	0	0	0	0	0	1	15	0	0.333333	0	0	0	0	0	0	0	40	0	0	0	0	1	0	0	0	0.333333	0	0	0	0	0	0	0	0
309	310	0.2	0	0	0	0	1.8	0.6	5	0.4	0.2	0	0	0	0	0	0	0	50	0	0	0	0	1.2	0	0	0	0.2	0	0	0	0	0	0	0	0
311	312	0.2	0.2	0	0	0.2	0	0.6	5	0.2	0.4	0	0	0	0	0	0	0.2	75	0	0	3	0	0.4	0	0	0	0.2	0	1	0	0	0	0	0	0
313	314	0.6	1.8	0	0	0	0	0.8	1	0.2	0	0	0	0	0	0	0	0	20	0	0	10	0	2.6	0	0	0	0	0	0	0.8	0	0	0	0	0
325	326	0.2	0	0	0	0	0.2	0.4	0	0	0.4	0	0	0	0	0	0	0	50	0	0	40	0	0.6	0	0	0	0	0	0	0	0	0	0	0	0
327	328	0	0	0	0	0	0	0.2	0	0	0	0	0	0	0	0	0	0	20	0	0	80	0	0.6	0	0	0	0	0	0	0.2	0	0	0	0	0
329	330	0	0	0	0	0.2	0	0.2	0	0	0	0	0	0	0	0	0	0	0	0	0	95	0	0	0	0	0	0	0	0	0	0	0	0	0	0
315	316	0.333333	0	0	0	0	0	1	2	0	0	0	0	0	3	0	0	0	85	0	0.333333	0	0	1	0.666667	0	0	0	0	0	0.333333	0	0	0	3	0
